# Supplementary material for: Dynamical symmetries and selection rules in high-harmonic generation spectroscopy of nonlinear molecules
Source: Royal Society of Chemistry journal article supplement (doi:10.1039/d5cp01624j), 2025-01-01
Supplement: d5cp01624j1.pdf [file d5cp01624j1.pdf]

# **Supporting information for “Dynamical symmetries and selection rules in high-harmonic generation spectroscopy of nonlinear molecules”**

Marco Marchetta,<sup>†</sup> Eleonora Luppi,<sup>‡</sup> and Emanuele Coccia<sup>\*,†</sup>

*<sup>†</sup>Dipartimento di Scienze Chimiche e Farmaceutiche, Università di Trieste, Trieste 34127, Italy*

*<sup>‡</sup>Laboratoire de Chimie Théorique, Sorbonne Université, CNRS, Paris, F-75005, France*

E-mail: [ecoccia@units.it](mailto:ecoccia@units.it)

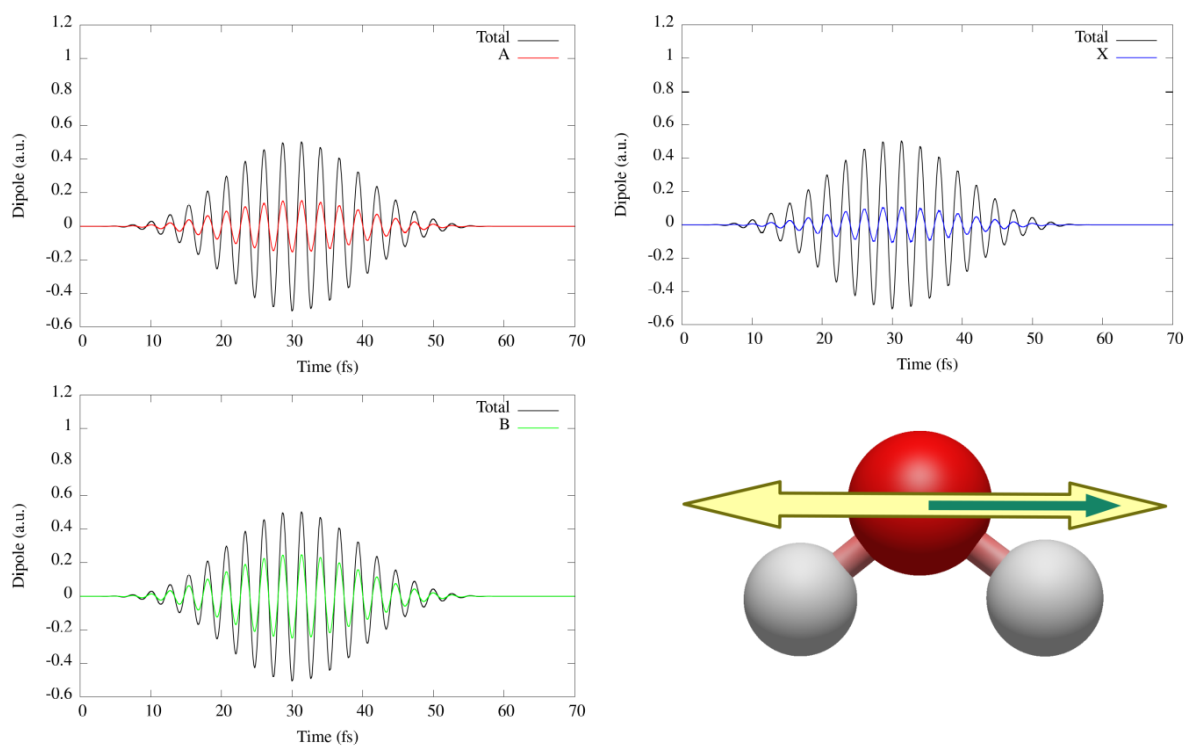

Figure S1: MO decomposition of the time-dependent dipole moment of H<sub>2</sub>O, with laser pulse polarised along the  $x$  direction and detection along the same direction, at the RT-TD-CIS level of theory.

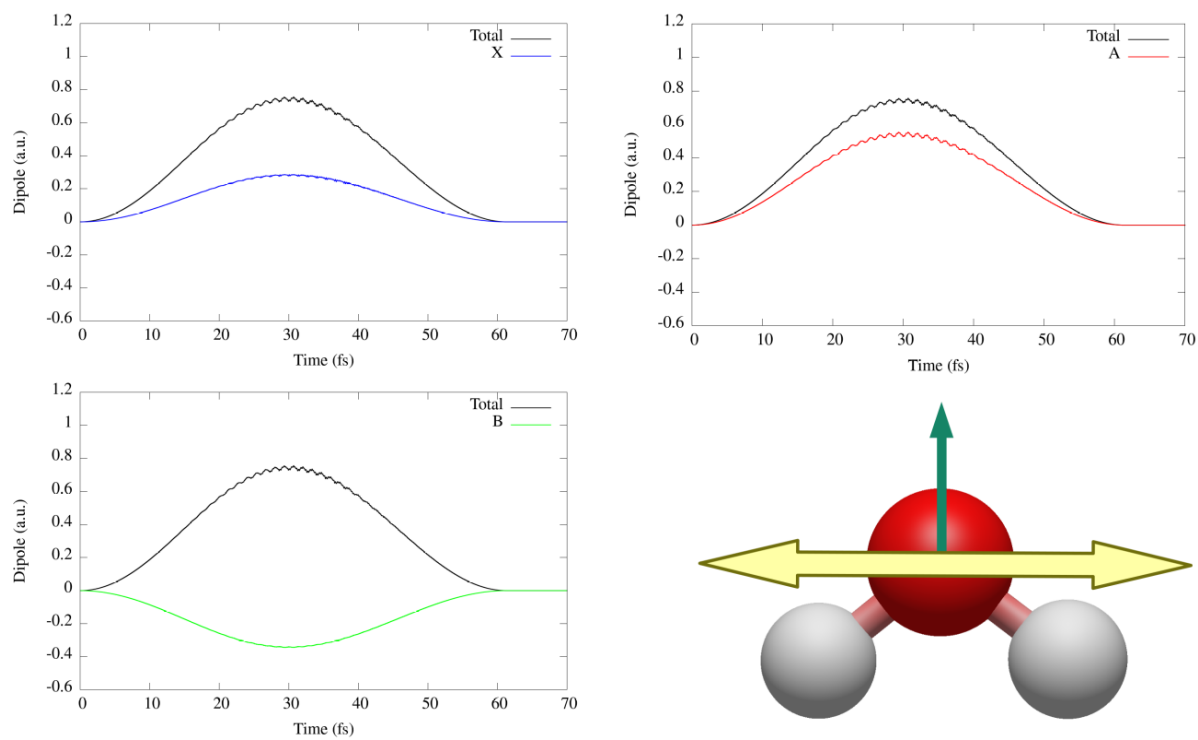

Figure S2: MO decomposition of the time-dependent dipole moment of  $\text{H}_2\text{O}$ , with laser pulse polarised along the  $x$  direction and detection along the  $z$  direction, at the RT-TD-CIS level of theory.

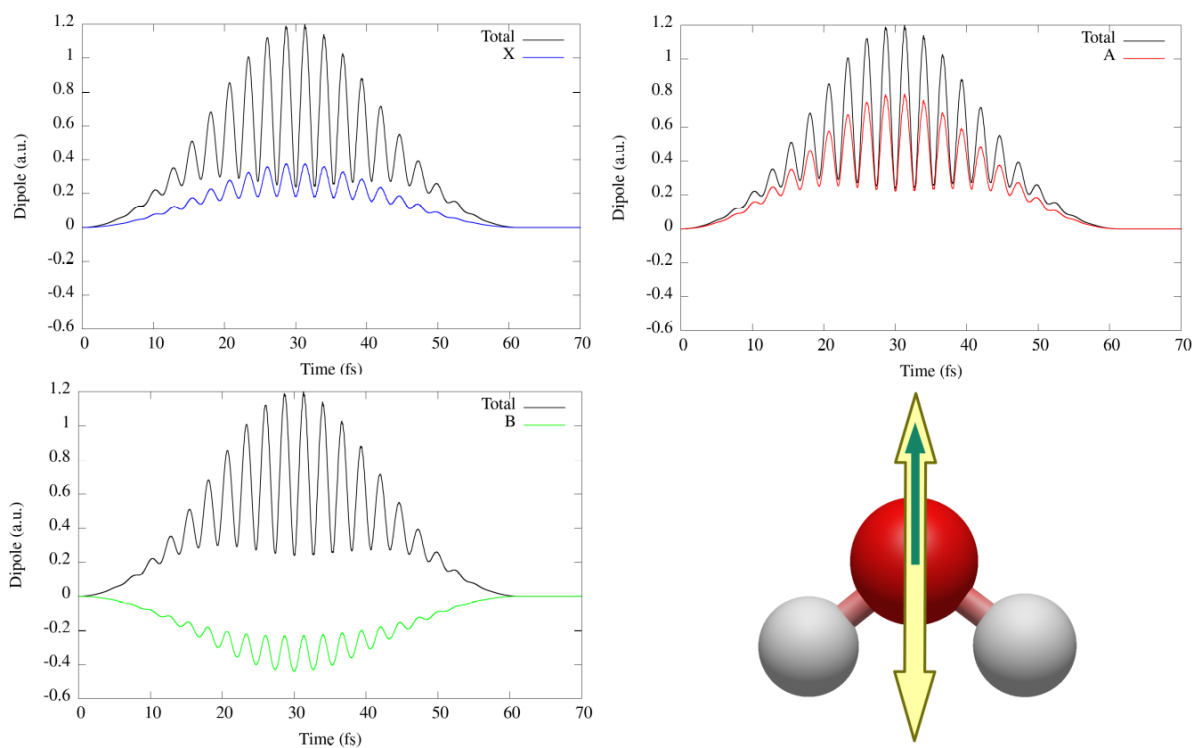

Figure S3: MO decomposition of the time-dependent dipole moment of H<sub>2</sub>O, with laser pulse polarised along the  $z$  direction and detection along the same direction, at the RT-TD-CIS level of theory.

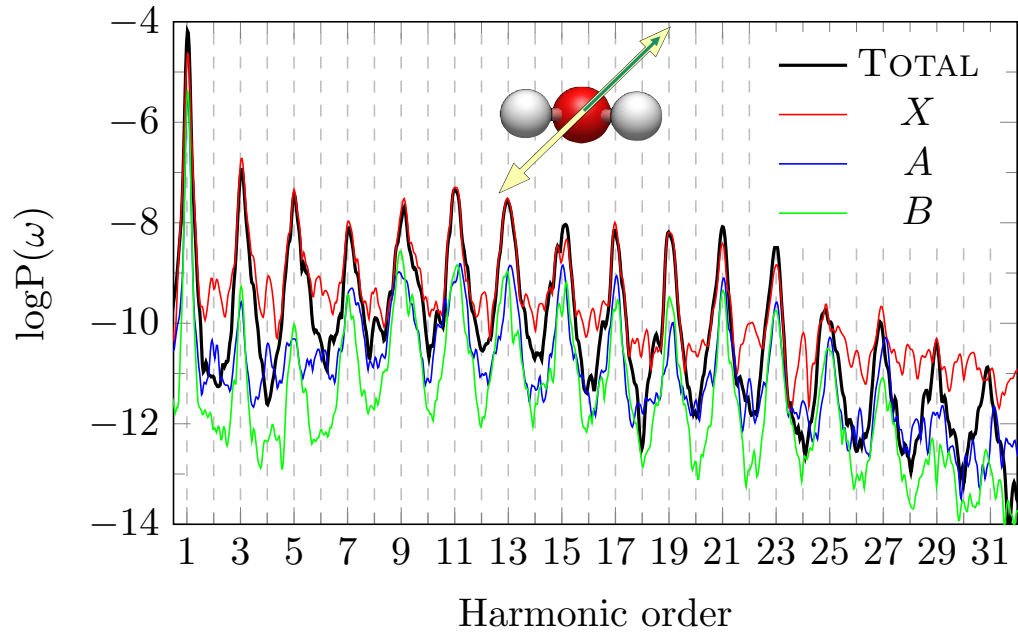

Figure S4: Channel-decomposition of the HHG spectrum, with pulse polarisation and detection in the  $xy$  plane, along a direction at  $45^\circ$  with respect to the molecular plane. The pulse polarisation is represented by the yellow double arrow, while a green arrow represents the direction of detection of HHG spectra.

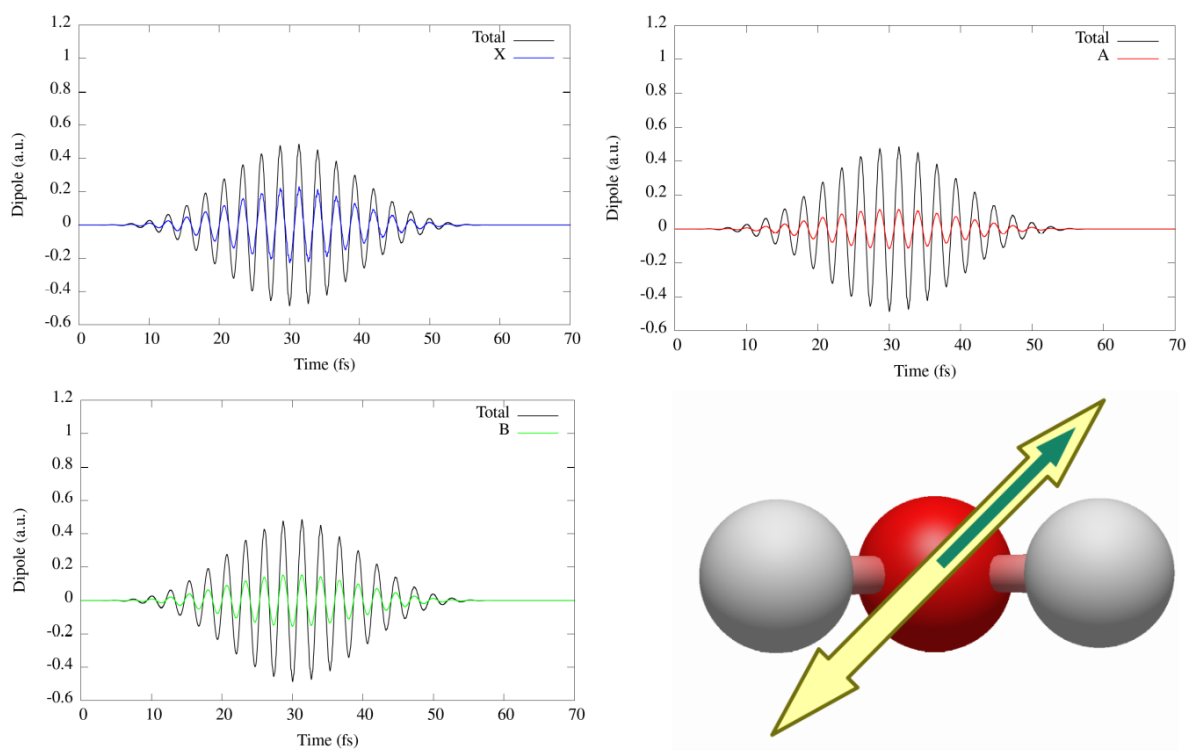

Figure S5: MO decomposition of the time-dependent dipole moment of H<sub>2</sub>O, with laser pulse polarised with an angle of 45° in the *xy* plane and detection along the same direction, at the RT-TD-CIS level of theory.

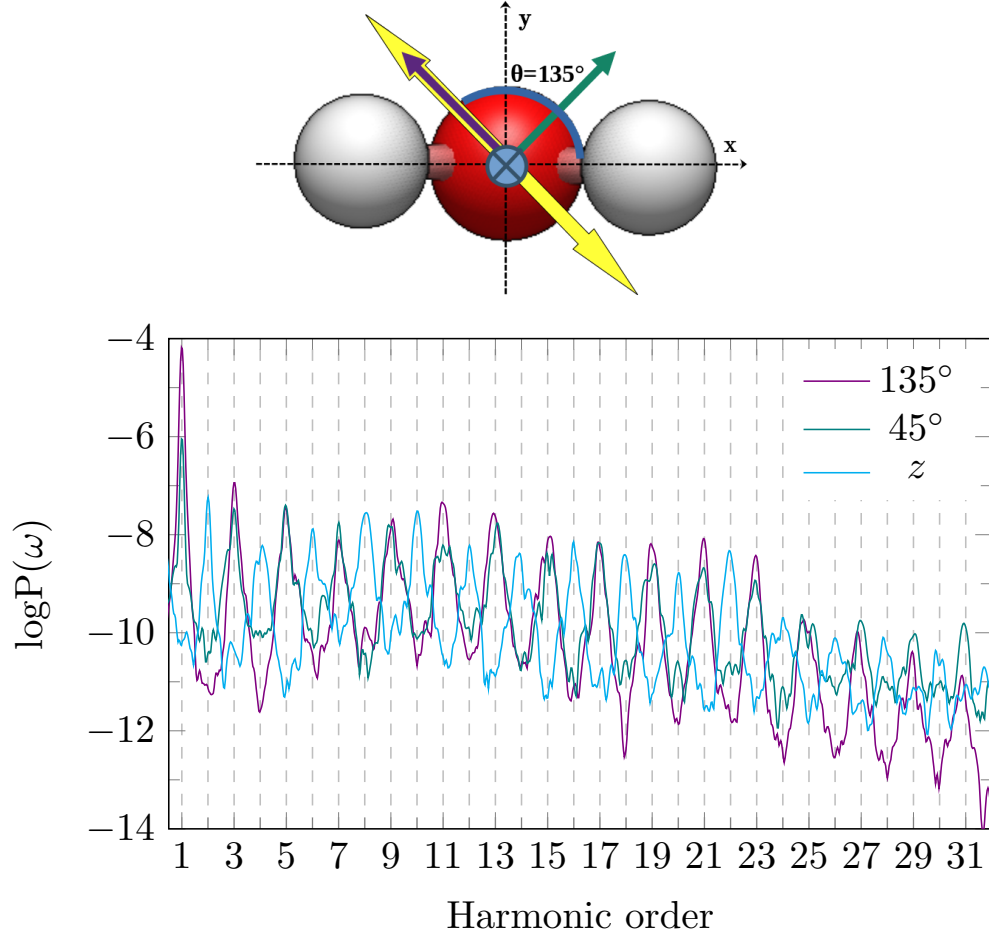

Figure S6: HHG spectra of H<sub>2</sub>O with laser pulse polarized with an angle of  $135^\circ$  in the  $xy$  plane. The HHG spectra are detected along the pulse polarization ( $135^\circ$  in the  $xy$  plane), with an angle of  $45^\circ$  in the  $xy$  plane, and along the  $z$  direction. For the detection in the  $xy$  plane, only odd harmonics are present, while in the  $z$  direction, only even harmonics are allowed.

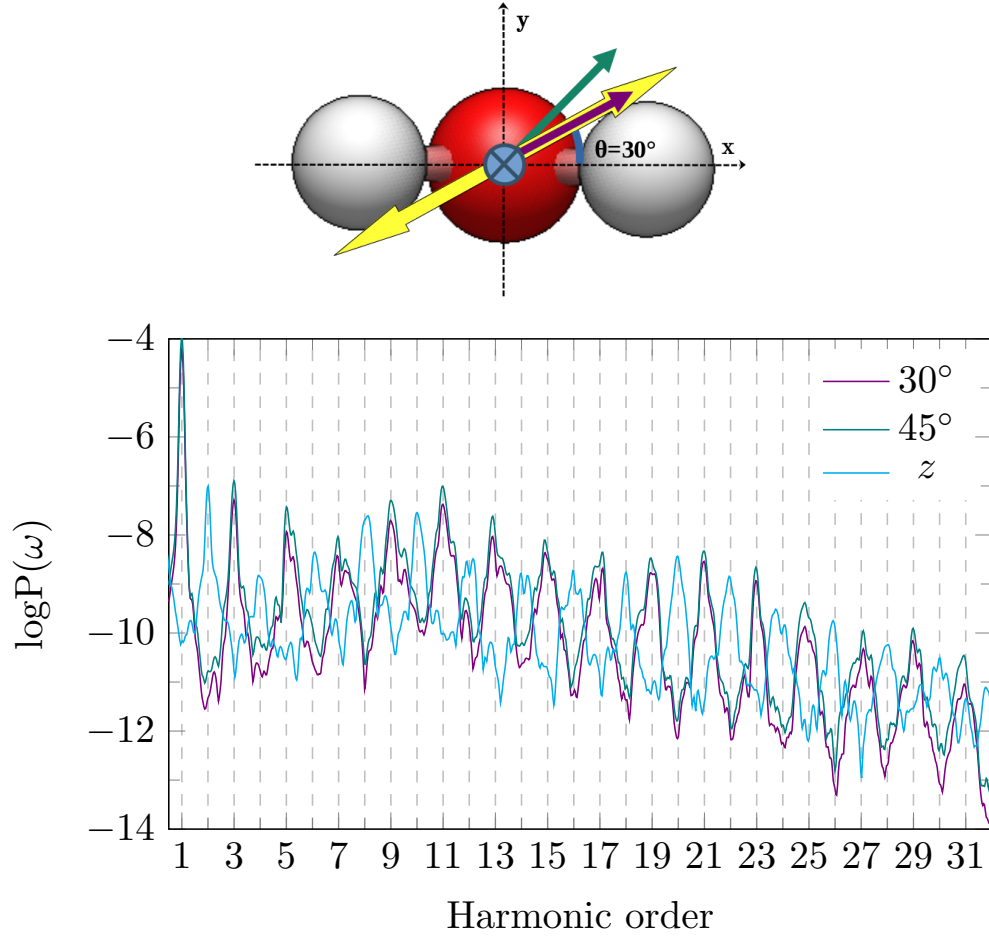

Figure S7: HHG spectra of H<sub>2</sub>O with laser pulse polarized with an angle of  $30^\circ$  in the  $xy$  plane. The HHG spectra are detected along the pulse polarization ( $30^\circ$  in the  $xy$  plane), with an angle of  $45^\circ$  in the  $xy$  plane, and along the  $z$  direction. Only odd harmonics are present for detection in the  $xy$  plane, while only even harmonics are allowed in the  $z$  direction.



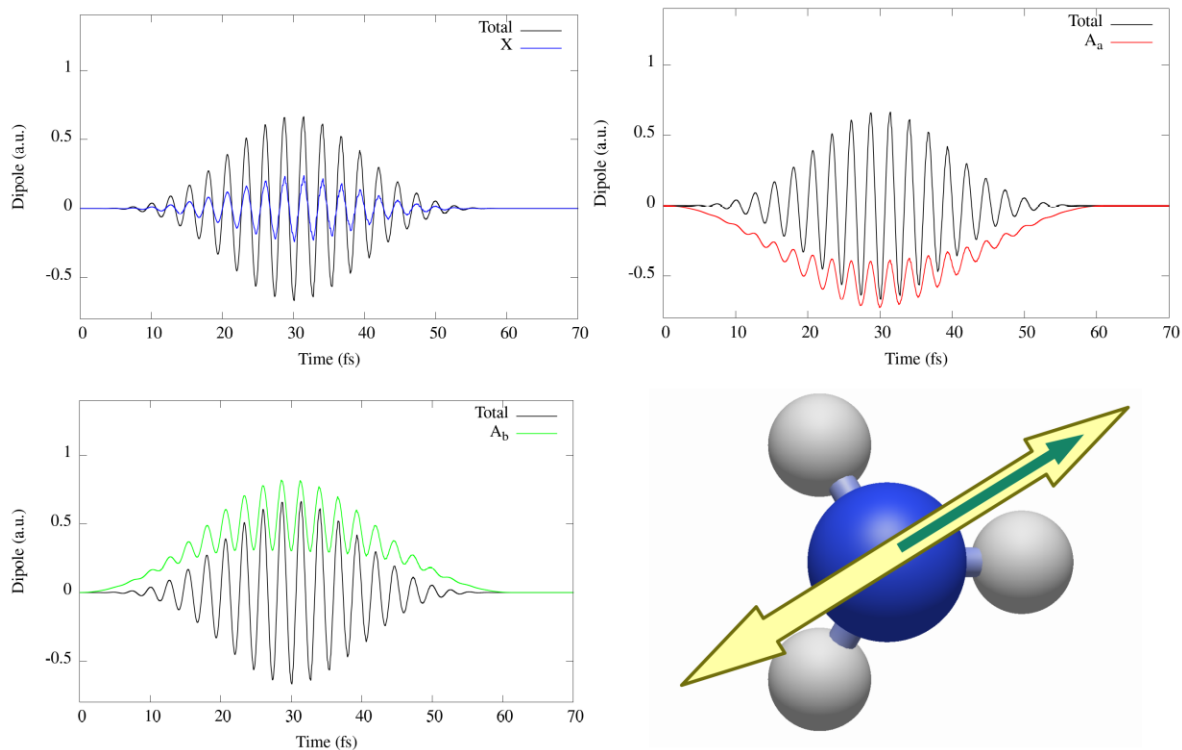

Figure S8: MO decomposition of the time-dependent dipole moment of NH<sub>3</sub>, with laser pulse polarised perpendicular to the  $\sigma'_v$  reflection plane of the NH<sub>3</sub> molecule and detection along the same direction, at the RT-TD-CIS level of theory.

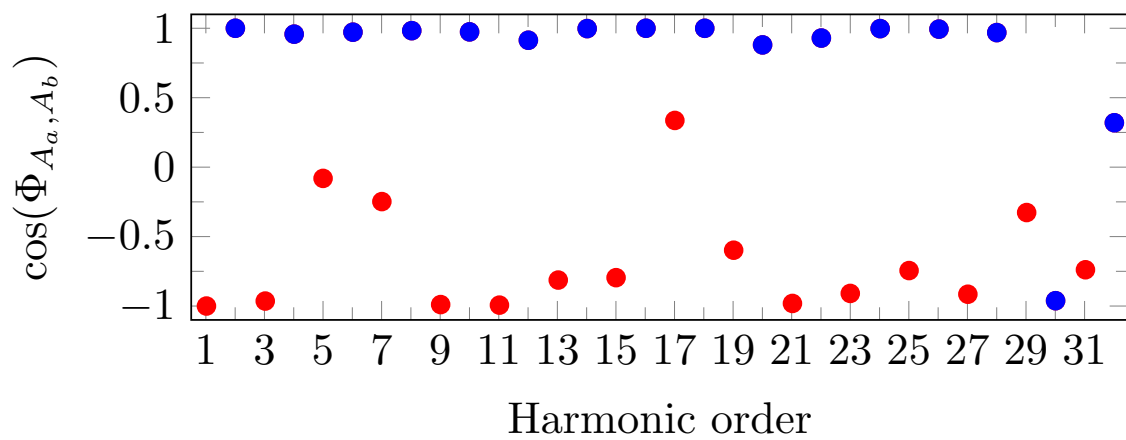

Figure S9: Phase of the interference between  $A_a$  and  $A_b$  channels of  $\text{NH}_3$ , with laser pulse polarised perpendicular to the  $\sigma'_v$  reflection plane of the  $\text{NH}_3$  molecule and detection along the  $z$  direction, at the RT-TD-CIS level of theory.

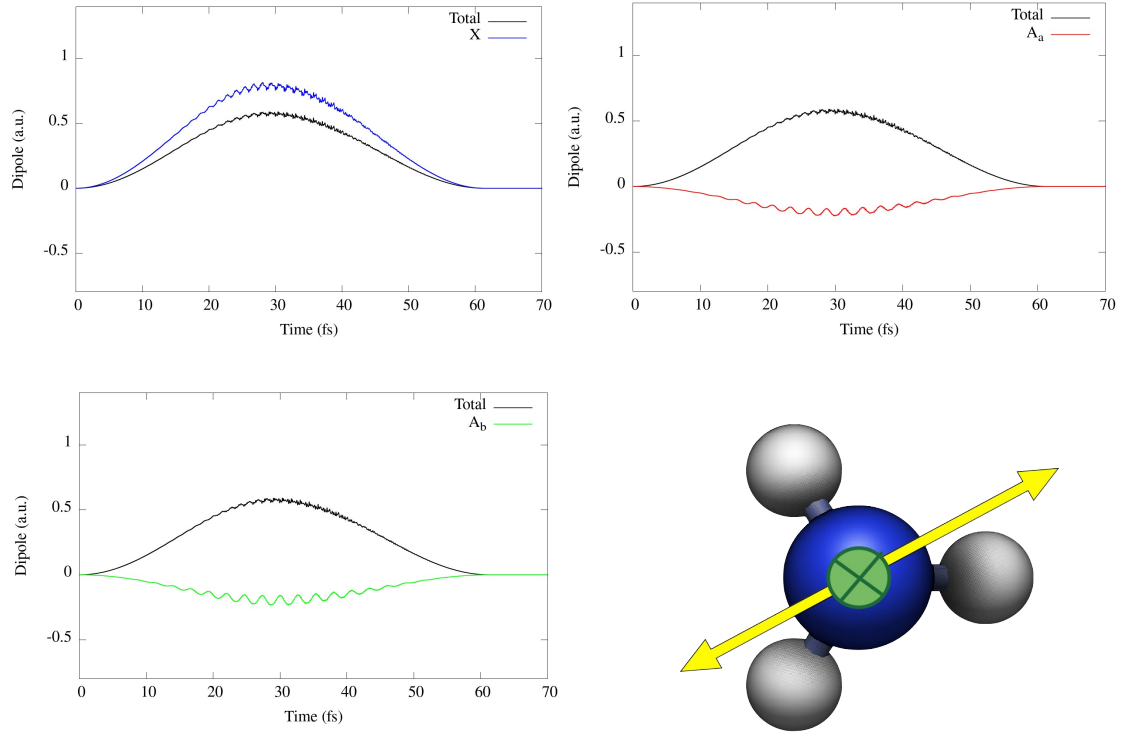

Figure S10: MO decomposition of the time-dependent dipole moment of NH<sub>3</sub>, with laser pulse polarised perpendicular to the  $\sigma'_v$  reflection plane of the NH<sub>3</sub> molecule and detection along the  $z$  direction, at the RT-TD-CIS level of theory.

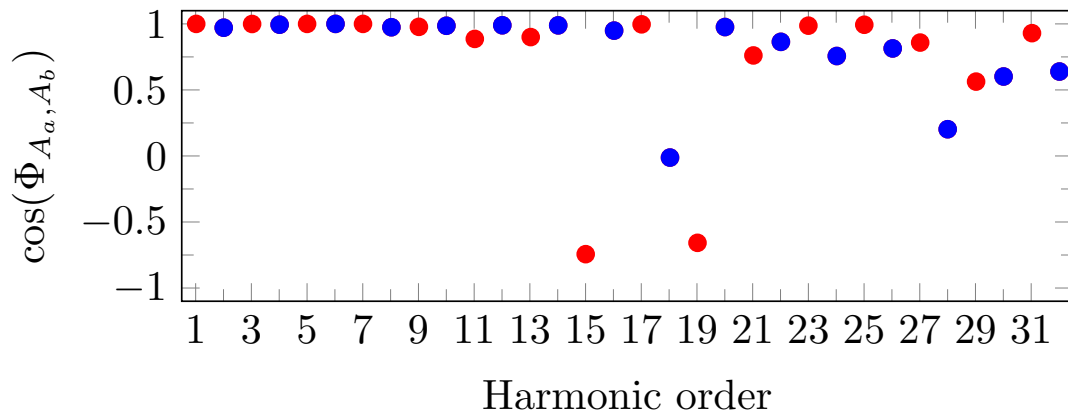

Figure S11: Phase of the interference between  $A_a$  and  $A_b$  channels of NH<sub>3</sub>, with laser pulse along the  $z$  axis and detection along the same direction, at the RT-TD-CIS level of theory.

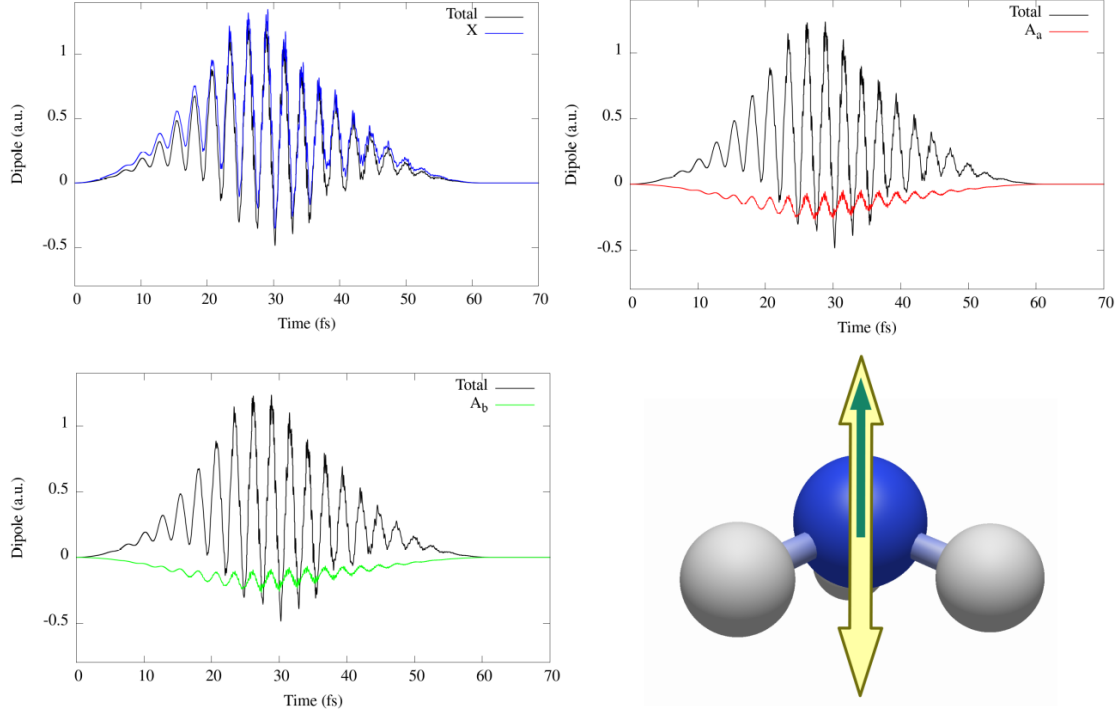

Figure S12: MO decomposition of the time-dependent dipole moment of  $\text{NH}_3$ , with laser pulse along the  $z$  axis and detection along the same direction, at the RT-TD-CIS level of theory.

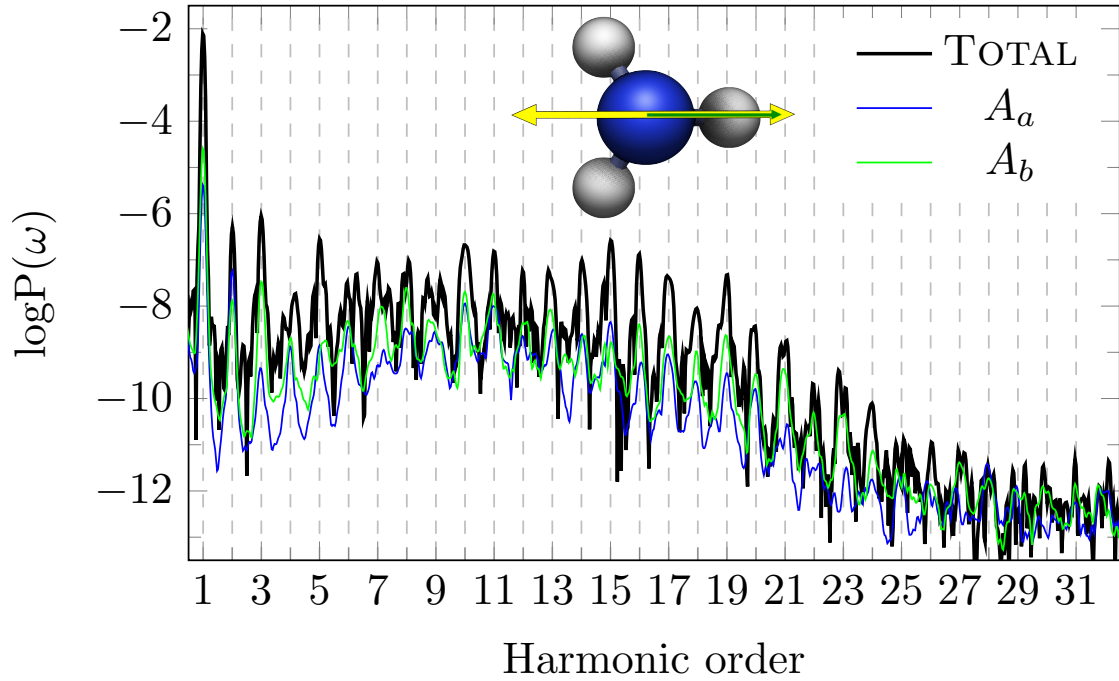

Figure S13: Comparison between  $A_a$  and  $A_b$  channels of  $\text{NH}_3$ , with laser pulse along the  $x$  axis and detection along the same direction, at the RT-TD-CIS level of theory.
